# Supplementary material for: Syringaresinol Inhibits UVA-Induced MMP-1 Expression by Suppression of MAPK/AP-1 Signaling in HaCaT Keratinocytes and Human Dermal Fibroblasts
Source: PubMed Central journal article supplement (PMC7312901; doi:10.3390/ijms21113981), 2020-06-01
Supplement: ijms-21-03981-s001.pdf [file ijms-21-03981-s001.pdf]

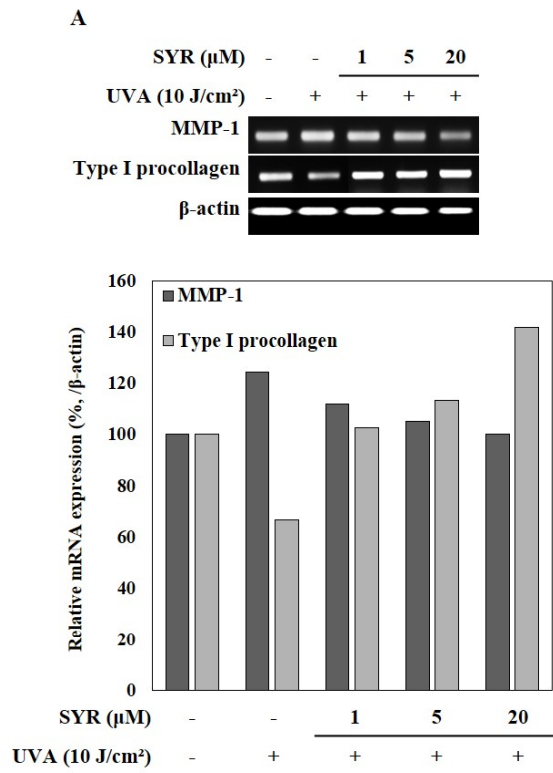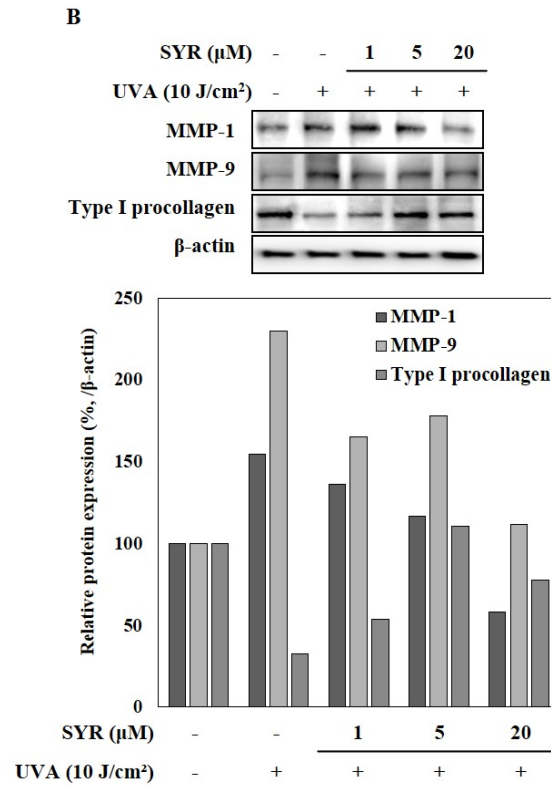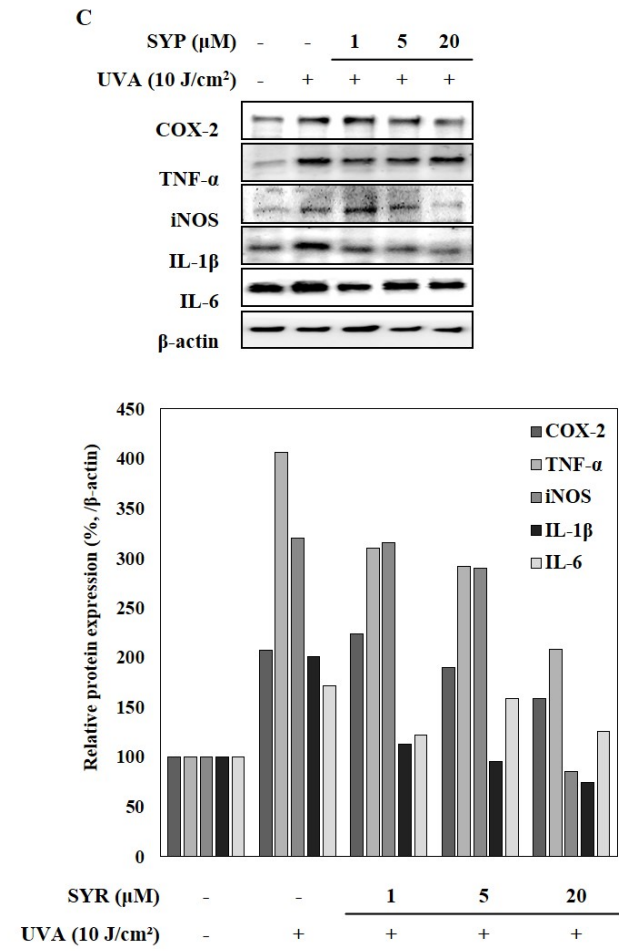

Figure S1. Quantification of Figure 2.

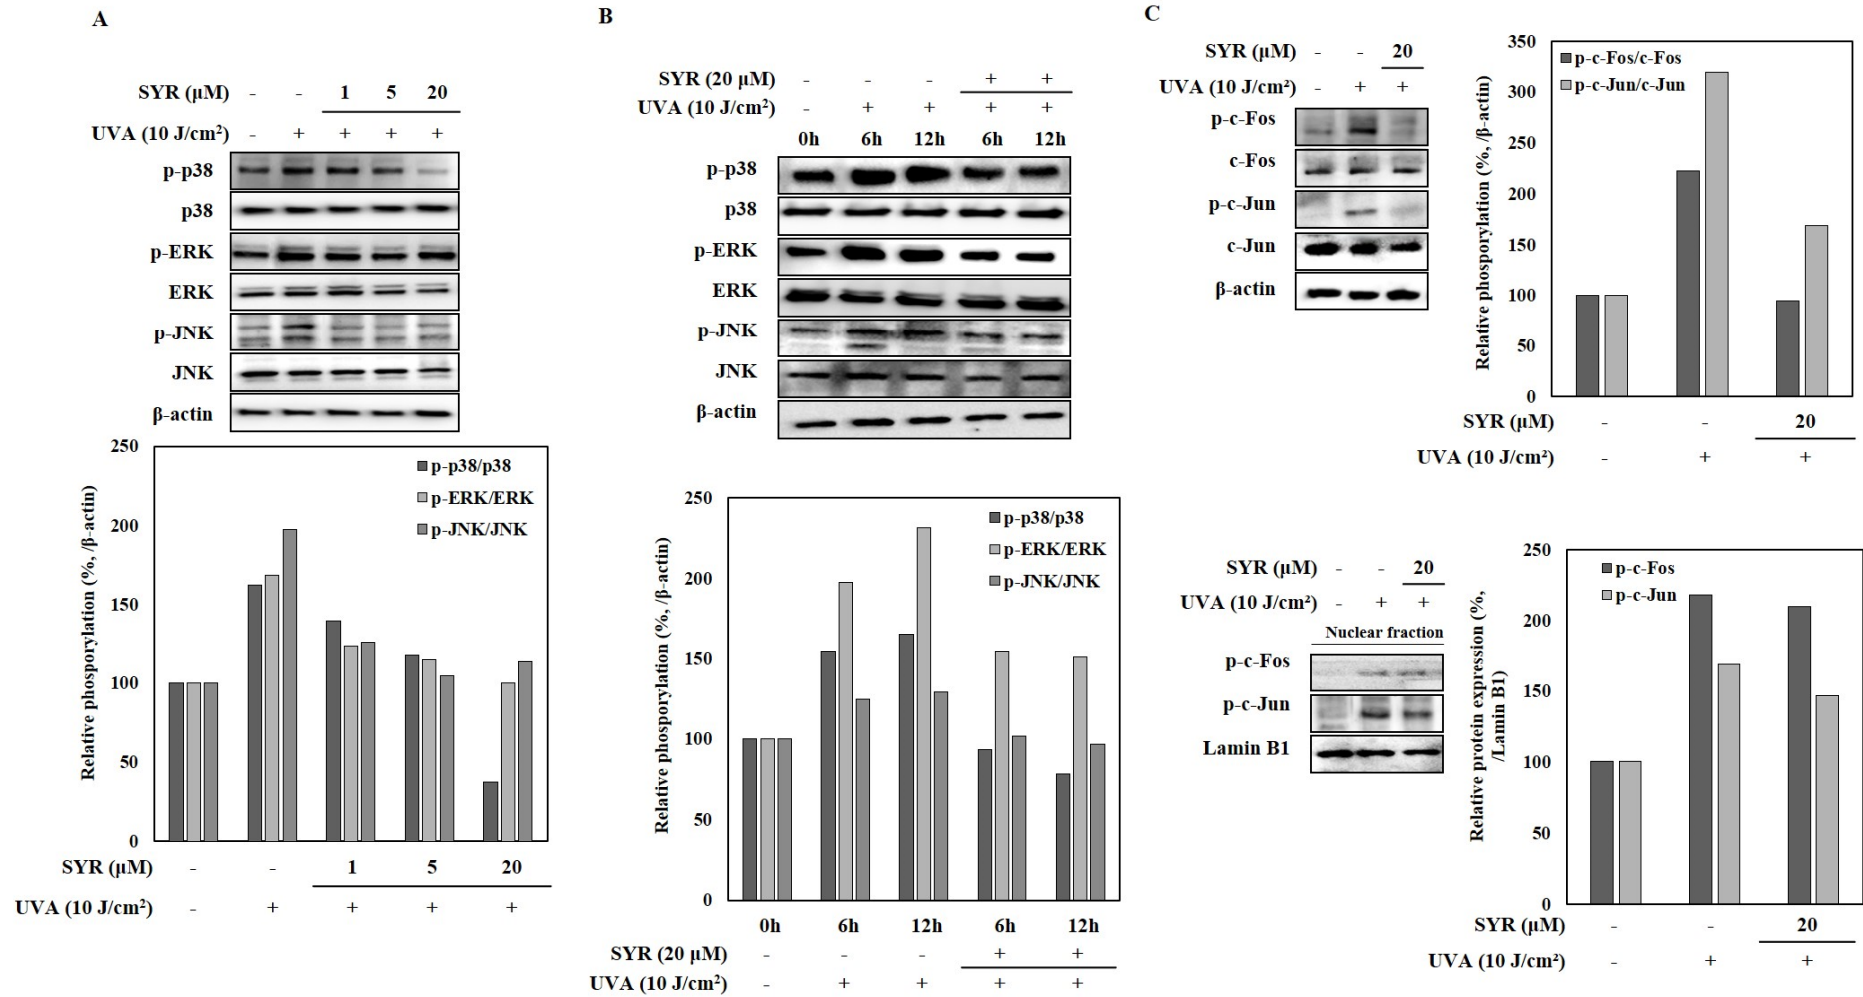

Figure S2. Quantification of Figure 3.

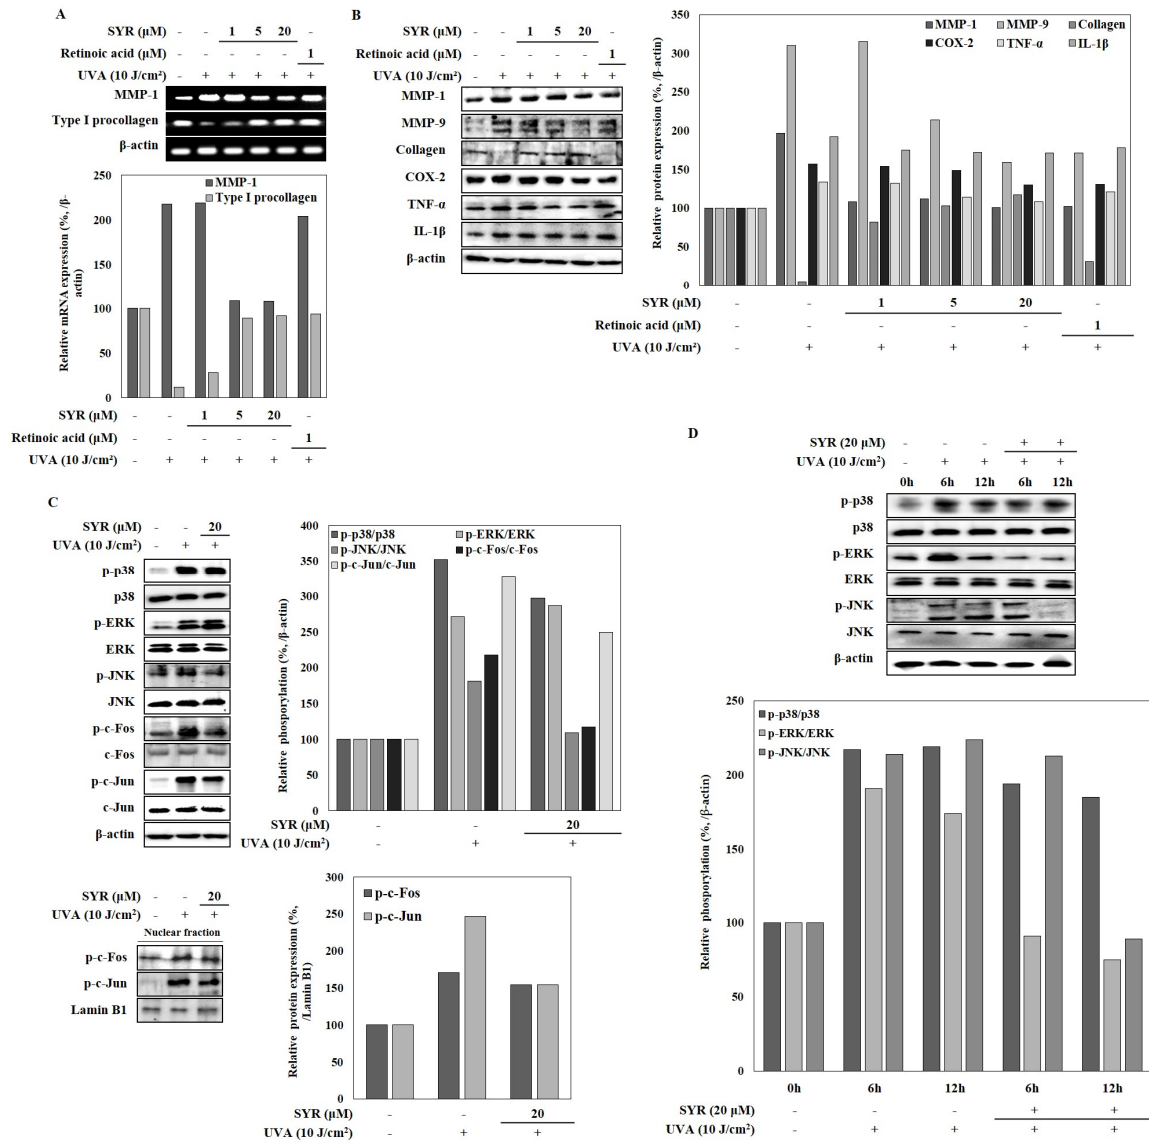

Figure S3. Quantification of Figure 5.
